# Supplementary material for: Asphaltene: structural characterization, molecular functionalization, and application as a low-cost filler in epoxy composites
Source: Royal Society of Chemistry journal article supplement (doi:10.1039/c5ra00509d), 2015-01-01
Supplement: c5ra00509d1.pdf [file c5ra00509d1.pdf]

Electronic Supplementary Information

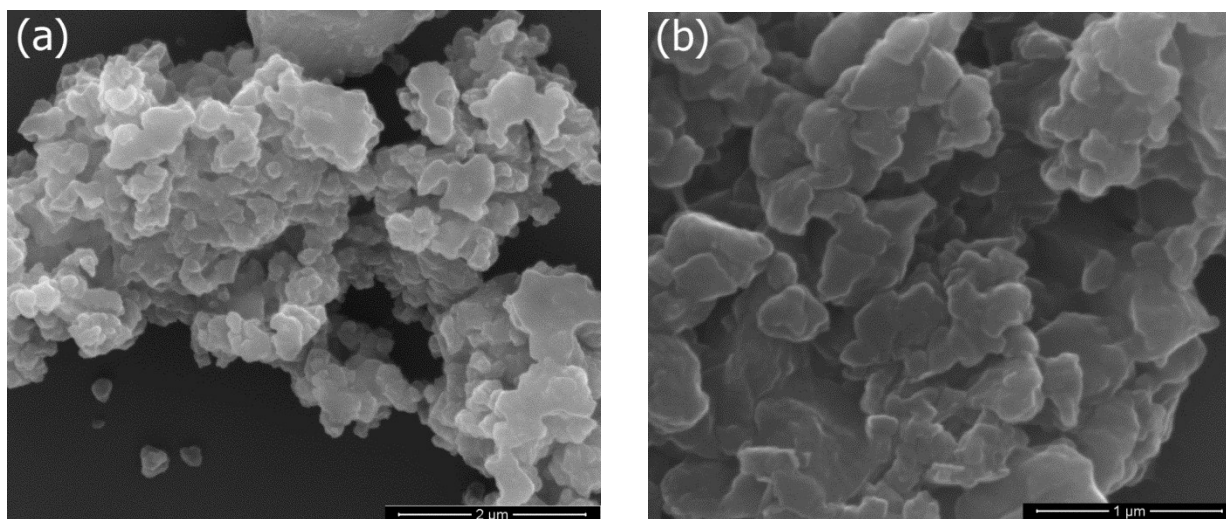

Figure S1. SEM images of asphaltene particles at (a) 20,000 ×; (b) 40,000 ×

Table S1. Deconvoluted peak data of high-resolution spectra of elements in functionalized asphaltene

|               |       | <b>Atomic concentration (%)</b> | <b>Position (eV)</b> | <b>FWHM (eV)</b> | <b>Area</b> | <b>%Area</b> | <b>Bond assignments</b> |
|---------------|-------|---------------------------------|----------------------|------------------|-------------|--------------|-------------------------|
| GPTMS-treated | C 1s  | 88.05                           | 284.86               | 2.0              | 69152       | 97.56        | C-C / C-H               |
|               |       |                                 | 286.47               | 1.6              | 1697        | 2.39         | C=O / C-O-C             |
|               |       |                                 | 290.14               | 1.6              | 30          | 0.04         | O=C-O                   |
|               | O 1s  | 6.22                            | 532.61               | 2.22             | 11182       | 88.75        | C-O-C                   |
|               |       |                                 | 534.31               | 2.46             | 1418        | 11.25        | O=C-O                   |
|               | N 1s  | 1.09                            | 397.89               | 1.80             | 356         | 24.67        | Pyridinic               |
|               |       |                                 | 400.06               | 1.99             | 1086        | 75.33        | Pyrrolic                |
|               | S 2p  | 1.89                            | 164.02               | 2.18             | 2016        | 66.67        | Thiophenic              |
|               |       |                                 | 165.20               | 2.66             | 1008        | 33.33        | Sulfite / sulfonyl      |
|               | Si 2p | 2.75                            | 102.31               | 1.96             | 2377        | 88.11        | Si-O-C                  |
| 103.49        |       |                                 | 1.90                 | 321              | 11.89       | Si-O-Si      |                         |
| APTES-treated | C 1s  | 87.49                           | 285.12               | 1.89             | 67343       | 89.43        | C-C                     |
|               |       |                                 | 286.71               | 2.2              | 7171        | 9.52         | C=O / C-O-C / C-N       |
|               |       |                                 | 289.62               | 1.94             | 790         | 1.05         | O=C-O                   |
|               | O 1s  | 6.64                            | 532.82               | 2.23             | 11169       | 78.96        | C-O-C                   |
|               |       |                                 | 533.91               | 2.46             | 2976        | 21.04        | O=C-O                   |
|               | N 1s  | 1.83                            | 398.46               | 2.80             | 710         | 25.92        | Pyridinic               |
|               |       |                                 | 400.18               | 2.22             | 2030        | 74.08        | Pyrrolic                |
|               | S 2p  | 1.59                            | 163.88               | 1.84             | 1893        | 66.67        | Thiophenic              |
|               |       |                                 | 165.06               | 2.04             | 947         | 33.33        | Sulfite / sulfonyl      |
|               | Si 2p | 2.45                            | 102.25               | 1.78             | 1899        | 70.77        | Si-O-C                  |
| 103.43        |       |                                 | 1.98                 | 784              | 29.23       | Si-O-Si      |                         |

(a)

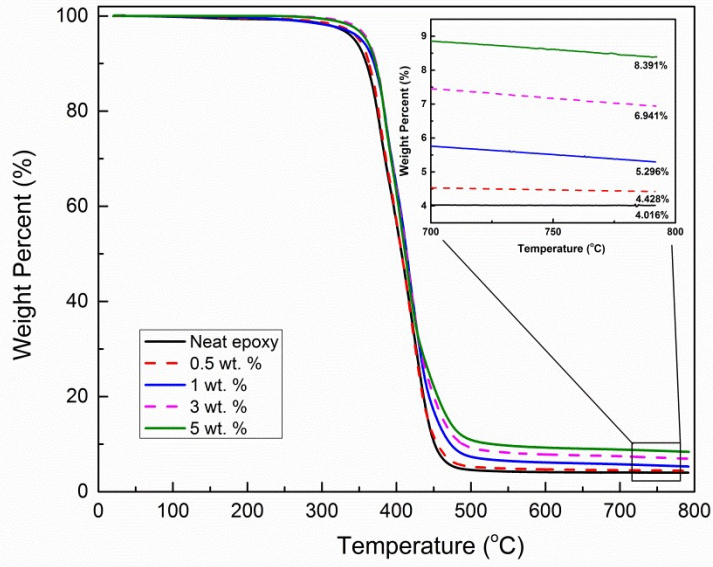

(b)

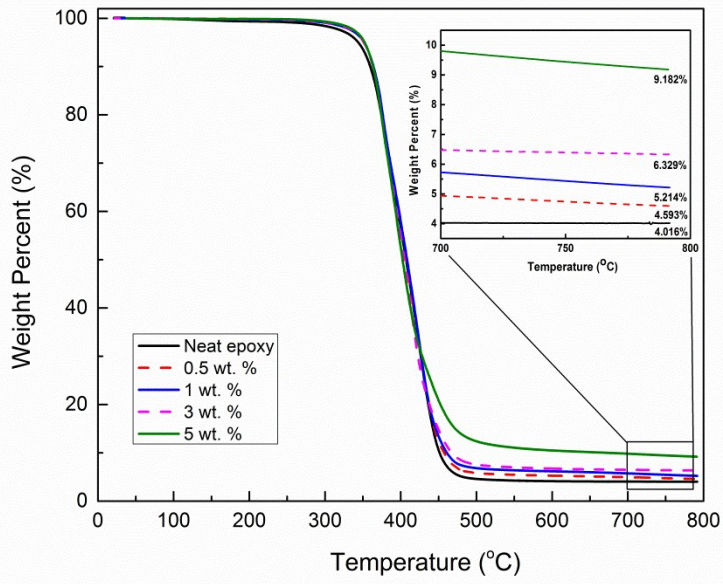

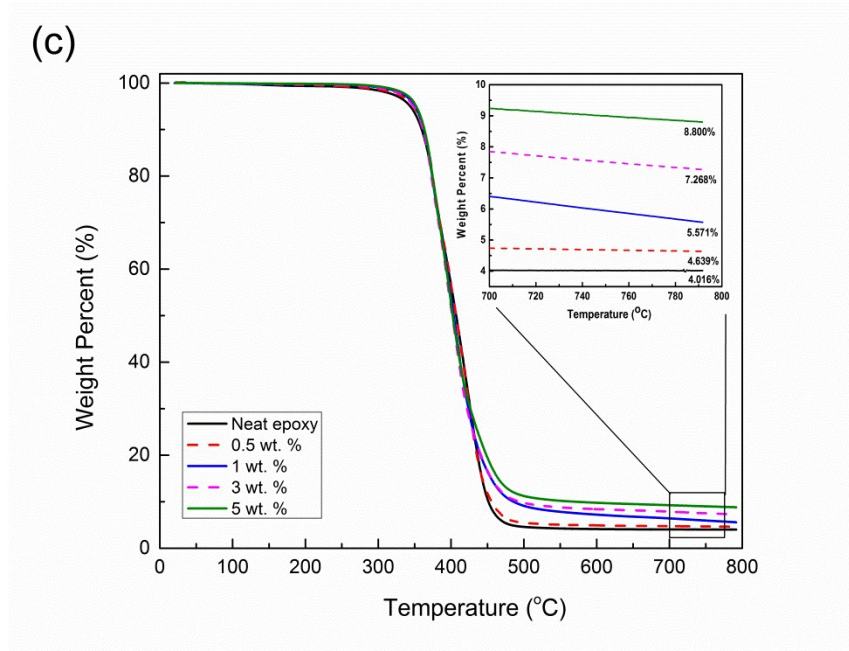

Figure S2. Thermal degradation of (a) pristine, (b) APTES-treated, (c) GPTMS-treated asphaltene reinforced epoxy composites at different loading levels in nitrogen atmosphere
